# Supplementary material
Source: Springer Nature journal article supplement (https://www.springermedizin.de/resource/supplementary/12887_2013_953_MOESM2_ESM.pdf/9476876)

**Figure 2: National trend for wasting compared to trends for boys aged 24-35 months, boys in Rift-Valley province and boys born to mothers with no education**

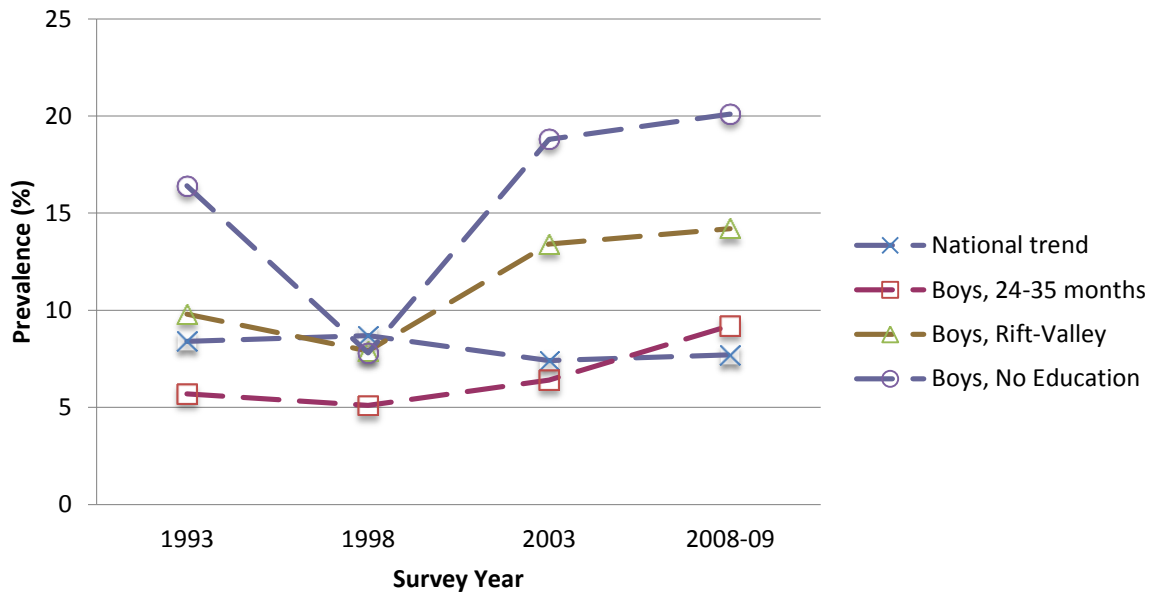

Supplement: MOESM2 [file 9476876]
